# Supplementary material for: Knowledge and Practices among Dental Practitioners Regarding the Use of Antimicrobials for Periodontal Diseases: An Online Survey in Saudi Arabia
Source: MDPI journal article supplement (doi:10.3390/pharma2010007), 2023-03-01
Supplement: s1 [file s1]

Archive with 5 entries (5 files):
- Supplementary Table S1.pdf
- Supplementary Table S2.pdf
- Supplementary Table S3.pdf
- Supplementary Table S4.pdf
- Supplementary Table S5.pdf
