# Supplementary material for: Knowledge and Practices among Dental Practitioners Regarding the Use of Antimicrobials for Periodontal Diseases: An Online Survey in Saudi Arabia
Source: MDPI journal article supplement (doi:10.3390/pharma2010007), 2023-03-01
Supplement: s1 [file s1 › Supplementary Table S1.pdf]

Supplementary Table S1. Attendance of continuing education program and source of information on use of antimicrobials in periodontal therapy (N=223)

| Variable                                                                                                                            | Number | %    |
|-------------------------------------------------------------------------------------------------------------------------------------|--------|------|
| Did you attend any course or continuing education program on use of antibiotics in periodontal therapy within the previous 2 years? |        |      |
| Yes                                                                                                                                 | 79     | 35.4 |
| No                                                                                                                                  | 144    | 64.6 |
| source of information: 1) Textbook                                                                                                  |        |      |
| Yes                                                                                                                                 | 175    | 78.5 |
| No                                                                                                                                  | 48     | 21.5 |
| source of information: 2) Organizational institutional guideline                                                                    |        |      |
| Yes                                                                                                                                 | 173    | 77.6 |
| No                                                                                                                                  | 50     | 22.4 |
| source of information: 3) Online                                                                                                    |        |      |
| Yes                                                                                                                                 | 169    | 75.8 |
| No                                                                                                                                  | 54     | 24.2 |
