# Supplementary material for: Knowledge and Practices among Dental Practitioners Regarding the Use of Antimicrobials for Periodontal Diseases: An Online Survey in Saudi Arabia
Source: MDPI journal article supplement (doi:10.3390/pharma2010007), 2023-03-01
Supplement: s1 [file s1 › Supplementary Table S2.pdf]

Supplementary Table S2.The responses regarding indications of antimicrobials for various clinical symptoms and diagnoses by Workplace (N=223)

| Variable ("Yes" responses)                      | Public |        | Private |       |
|-------------------------------------------------|--------|--------|---------|-------|
|                                                 | Number | %      | Number  | %     |
| Sever pain                                      | 29     | %19.6  | 19      | 25.3% |
| Gingival bleeding                               | 18     | 12.12% | 10      | 13.3% |
| Gingival enlargement                            | 40     | 27.0%  | 19      | 25.3% |
| gingival recession                              | 14     | 9.5%   | 10      | 13.3% |
| periodontal pocket                              | 44     | 29.7%  | 24      | 32.0% |
| Tooth/teeth mobility                            | 15     | 10.1%  | 12      | 16.0% |
| Periodontal abscess                             | 126    | 85.1%  | 62      | 82.7% |
| Acute gingivitis with herpes simplex            | 42     | 28.4%  | 27      | 36.0% |
| Furcation involvement                           | 18     | 12.2%  | 9       | 12.0% |
| Periodontitis Grade A                           | 15     | 10.1%  | 14      | 18.7% |
| Periodontitis Grade B                           | 15     | 10.1%  | 23      | 30.7% |
| Periodontitis Grade C (Aggressive )             | 97     | 65.5%  | 55      | 73.3% |
| Gingival tumors                                 | 32     | 21.6%  | 17      | 22.7% |
| Refractory periodontitis                        | 60     | 40.5%  | 37      | 49.3% |
| Post periodontal surgery                        | 122    | 82.4%  | 56      | 74.7% |
| ANUP                                            | 122    | 82.4%  | 66      | 88.0% |
| After finishing treatment in maintenance period | 20     | 13.5%  | 12      | 16.0% |
