# Supplementary material for: Knowledge and Practices among Dental Practitioners Regarding the Use of Antimicrobials for Periodontal Diseases: An Online Survey in Saudi Arabia
Source: MDPI journal article supplement (doi:10.3390/pharma2010007), 2023-03-01
Supplement: s1 [file s1 › Supplementary Table S3.pdf]

**Supplementary Table S3. The responses regarding indications of antimicrobials for various clinical symptoms and diagnoses by specialty N=223**

| Variable<br>("Yes" responses)                   | GDP    |        | 6th Year Student |       | Intern |        | Periodontist |       | Other specialty |       |
|-------------------------------------------------|--------|--------|------------------|-------|--------|--------|--------------|-------|-----------------|-------|
|                                                 | Number | %      | Number           | %     | Number | %      | Number       | %     | Number          | %     |
| Sever pain                                      | 5      | 17.2 % | 19               | 30.6% | 12     | 22.2 % | 2            | 5.6 % | 10              | 23.8% |
| Gingival bleeding                               | 3      | 10.3 % | 9                | 14.5% | 8      | 14.8 % | 1            | 2.8 % | 7               | 16.7% |
| Gingival enlargement                            | 10     | 34.5 % | 18               | 29.0% | 19     | 35.2 % | 2            | 5.6 % | 10              | 23.8% |
| gingival recession                              | 3      | 10.3 % | 8                | 12.9% | 5      | 9.3%   | 1            | 2.8 % | 7               | 16.7% |
| periodontal pocket                              | 6      | 20.7 % | 20               | 32.3% | 15     | 27.8 % | 8            | 22.2% | 19              | 45.2% |
| Tooth/teeth mobility                            | 2      | 6.9%   | 7                | 11.3% | 6      | 11.1 % | 3            | 8.3 % | 9               | 21.4% |
| Periodontal abscess                             | 26     | 89.7 % | 48               | 77.4% | 46     | 85.2 % | 31           | 86.1% | 37              | 88.1% |
| Acute gingivitis with herpes simplex            | 9      | 31.0 % | 18               | 29.0% | 23     | 42.6 % | 5            | 13.9% | 14              | 33.3% |
| Furcation involvement                           | 2      | 6.9%   | 6                | 9.7%  | 8      | 14.8 % | 4            | 11.1% | 7               | 16.7% |
| Periodontitis Grade A                           | 1      | 3.4%   | 9                | 14.5% | 7      | 13.0 % | 0            | 0.0 % | 12              | 28.6% |
| Periodontitis Grade B                           | 4      | 13.8 % | 14               | 22.6% | 6      | 11.1 % | 2            | 5.6 % | 12              | 28.6% |
| Periodontitis Grade C (Aggressive )             | 9      | 31.0 % | 41               | 66.1% | 38     | 70.4 % | 33           | 91.7% | 31              | 73.8% |
| Gingival tumors                                 | 9      | 31.0 % | 11               | 17.7% | 16     | 29.6 % | 2            | 5.6 % | 11              | 26.2% |
| Refractory periodontitis                        | 6      | 20.7 % | 19               | 30.6% | 23     | 42.6 % | 29           | 80.6% | 20              | 47.6% |
| Post periodontal surgery                        | 23     | 79.3 % | 50               | 80.6% | 47     | 87.0 % | 21           | 58.3% | 37              | 88.1% |
| ANUP                                            | 15     | 51.7 % | 56               | 90.3% | 49     | 90.7 % | 30           | 83.3% | 38              | 90.5% |
| After finishing treatment in maintenance period | 4      | 13.8 % | 8                | 12.9% | 8      | 14.8 % | 3            | 8.3 % | 9               | 21.4% |
