# Supplementary material for: Knowledge and Practices among Dental Practitioners Regarding the Use of Antimicrobials for Periodontal Diseases: An Online Survey in Saudi Arabia
Source: MDPI journal article supplement (doi:10.3390/pharma2010007), 2023-03-01
Supplement: s1 [file s1 › Supplementary Table S4.pdf]

**Supplementary Table S4. The responses regarding the preferred antimicrobials prescribed for various clinical diagnoses by specialty N=223**

| Variable<br>("Yes" responses)                 | GDP           |          | 6th Year Student |          | Intern        |          | Periodontist  |          | Other specialty |          |
|-----------------------------------------------|---------------|----------|------------------|----------|---------------|----------|---------------|----------|-----------------|----------|
| Antibiotics used for Aggressive periodontitis | Number        | %        | Number           | %        | Number        | %        | Number        | %        | Number          | %        |
| Amoxicillin                                   | 17            | 58.6%    | 34               | 54.8%    | 36            | 66.7%    | 25            | 69.4%    | 21              | 50.0%    |
| Augmentin                                     | 17            | 58.6%    | 40               | 64.5%    | 35            | 64.8%    | 24            | 66.7%    | 25              | 59.5%    |
| Spiramycin                                    | 2             | 6.9%     | 10               | 16.1%    | 3             | 5.6%     | 2             | 5.6%     | 16              | 38.1%    |
| Azithromycin                                  | 5             | 17.2%    | 15               | 24.2%    | 5             | 9.3%     | 4             | 11.1%    | 11              | 26.2%    |
| Clindamycin                                   | 13            | 44.8%    | 26               | 41.9%    | 22            | 40.7%    | 14            | 38.9%    | 19              | 45.2%    |
| Tetracycline                                  | 5             | 17.2%    | 13               | 21.0%    | 7             | 13.0%    | 9             | 25.0%    | 14              | 33.3%    |
| Doxycycline                                   | 6             | 20.7%    | 20               | 32.3%    | 16            | 29.6%    | 18            | 50.0%    | 16              | 38.1%    |
| Metronidazole                                 | 9             | 31.0%    | 49               | 79.0%    | 38            | 70.4%    | 34            | 94.4%    | 32              | 76.2%    |
| Ciprofloxacin                                 | 5             | 17.2%    | 8                | 12.9%    | 5             | 9.3%     | 10            | 27.8%    | 13              | 31.0%    |
| Minocycline                                   | 3             | 10.3%    | 9                | 14.5%    | 7             | 13.0%    | 9             | 25.0%    | 9               | 21.4%    |
| Erythromycin                                  | 5             | 17.2%    | 12               | 19.4%    | 7             | 13.0%    | 1             | 2.8%     | 8               | 19.0%    |
| Not Use Antibiotic At All                     | 15            | 51.7%    | 15               | 24.2%    | 7             | 13.0%    | 3             | 8.3%     | 6               | 14.3%    |
| <b>ANUP</b>                                   | <b>Number</b> | <b>%</b> | <b>Number</b>    | <b>%</b> | <b>Number</b> | <b>%</b> | <b>Number</b> | <b>%</b> | <b>Number</b>   | <b>%</b> |
| Amoxicillin                                   | 13            | 44.8%    | 36               | 58.1%    | 37            | 68.5%    | 19            | 52.8%    | 17              | 40.5%    |
| Augmentin                                     | 12            | 41.4%    | 37               | 59.7%    | 35            | 64.8%    | 21            | 58.3%    | 27              | 64.3%    |
| Spiramycin                                    | 4             | 13.8%    | 6                | 9.7%     | 6             | 11.1%    | 2             | 5.6%     | 16              | 38.1%    |
| Azithromycin                                  | 9             | 31.0%    | 11               | 17.7%    | 9             | 16.7%    | 2             | 5.6%     | 7               | 16.7%    |
| Clindamycin                                   | 9             | 31.0%    | 16               | 25.8%    | 18            | 33.3%    | 9             | 25.0%    | 16              | 38.1%    |
| Tetracycline                                  | 5             | 17.2%    | 11               | 17.7%    | 8             | 14.8%    | 4             | 11.1%    | 14              | 33.3%    |
| Doxycycline                                   | 5             | 17.2%    | 14               | 22.6%    | 11            | 20.4%    | 6             | 16.7%    | 16              | 38.1%    |
| Metronidazole                                 | 12            | 41.4%    | 46               | 74.2%    | 36            | 66.7%    | 28            | 77.8%    | 29              | 69.0%    |
| Ciprofloxacin                                 | 4             | 13.8%    | 6                | 9.7%     | 8             | 14.8%    | 5             | 13.9%    | 12              | 28.6%    |
| Minocycline                                   | 3             | 10.3%    | 4                | 6.5%     | 6             | 11.1%    | 1             | 2.8%     | 11              | 26.2%    |

|                           |               |          |               |          |               |          |               |          |               |          |
|---------------------------|---------------|----------|---------------|----------|---------------|----------|---------------|----------|---------------|----------|
|                           |               |          |               |          |               | 1%       |               | %        |               |          |
| Erythromycin              | 4             | 13.8%    | 6             | 9.7%     | 7             | 13.0%    | 4             | 11.1%    | 8             | 19.0%    |
| Not Use Antibiotic At All | 14            | 48.3%    | 9             | 14.5%    | 11            | 20.4%    | 3             | 8.3%     | 6             | 14.3%    |
| <b>Perio abscess</b>      | <b>Number</b> | <b>%</b> |
| Amoxicillin               | 25            | 86.2%    | 39            | 62.9%    | 40            | 74.1%    | 27            | 75.0%    | 24            | 57.1%    |
| Augmentin                 | 20            | 69.0%    | 42            | 67.7%    | 41            | 75.9%    | 25            | 69.4%    | 34            | 81.0%    |
| Spiramycin                | 2             | 6.9%     | 6             | 9.7%     | 2             | 3.7%     | 2             | 5.6%     | 14            | 33.3%    |
| Azithromycin              | 8             | 27.6%    | 6             | 9.7%     | 5             | 9.3%     | 1             | 2.8%     | 8             | 19.0%    |
| Clindamycin               | 17            | 58.6%    | 15            | 24.2%    | 26            | 48.1%    | 12            | 33.3%    | 17            | 40.5%    |
| Tetracycline              | 4             | 13.8%    | 3             | 4.8%     | 8             | 14.8%    | 3             | 8.3%     | 6             | 14.3%    |
| Doxycycline               | 6             | 20.7%    | 6             | 9.7%     | 8             | 14.8%    | 4             | 11.1%    | 8             | 19.0%    |
| Metronidazole             | 15            | 51.7%    | 32            | 51.6%    | 32            | 59.3%    | 27            | 75.0%    | 31            | 73.8%    |
| Ciprofloxacin             | 5             | 17.2%    | 2             | 3.2%     | 8             | 14.8%    | 4             | 11.1%    | 10            | 23.8%    |
| Minocycline               | 4             | 13.8%    | 0             | 0.0%     | 3             | 5.6%     | 1             | 2.8%     | 9             | 21.4%    |
| Erythromycin              | 11            | 37.9%    | 4             | 6.5%     | 3             | 5.6%     | 1             | 2.8%     | 5             | 11.9%    |
| Not Use Antibiotic at All | 5             | 17.2%    | 9             | 14.5%    | 8             | 14.8%    | 4             | 11.1%    | 6             | 14.3%    |
