# Supplementary material for: Knowledge and Practices among Dental Practitioners Regarding the Use of Antimicrobials for Periodontal Diseases: An Online Survey in Saudi Arabia
Source: MDPI journal article supplement (doi:10.3390/pharma2010007), 2023-03-01
Supplement: s1 [file s1 › Supplementary Table S5.pdf]

Supplementary Table S5 The responses regarding the preferred antimicrobials prescribed for various clinical diagnoses by Workplace N=223

| Type of Antibiotic Prescribed for Aggressive Periodontitis ("Yes" responses) | Public        |          | Private       |          |
|------------------------------------------------------------------------------|---------------|----------|---------------|----------|
|                                                                              | Number        | %        | Number        | %        |
| Amoxicillin                                                                  | 94            | 63.5%    | 39            | 52.0%    |
| Augmentin                                                                    | 88            | 59.5%    | 53            | 70.7%    |
| Spiramycin                                                                   | 12            | 8.1%     | 21            | 28.0%    |
| Azithromycin                                                                 | 23            | 15.5%    | 17            | 22.7%    |
| Clindamycin                                                                  | 60            | 40.5%    | 34            | 45.3%    |
| Tetracycline                                                                 | 26            | 17.6%    | 22            | 29.3%    |
| Doxycycline                                                                  | 50            | 33.8%    | 26            | 34.7%    |
| Metronidazole                                                                | 102           | 68.9%    | 60            | 80.0%    |
| Ciprofloxacin                                                                | 22            | 14.9%    | 19            | 25.3%    |
| Minocycline                                                                  | 26            | 17.6%    | 11            | 14.7%    |
| Erythromycin                                                                 | 19            | 12.8%    | 14            | 18.7%    |
| <b>ANUP</b>                                                                  | <b>Number</b> | <b>%</b> | <b>Number</b> | <b>%</b> |
| Amoxicillin                                                                  | 90            | 60.8%    | 32            | 42.7%    |
| Augmentin                                                                    | 82            | 55.4%    | 50            | 66.7%    |
| Spiramycin                                                                   | 17            | 11.5%    | 17            | 22.7%    |
| Azithromycin                                                                 | 25            | 16.9%    | 13            | 17.3%    |
| Clindamycin                                                                  | 42            | 28.4%    | 26            | 34.7%    |
| Tetracycline                                                                 | 25            | 16.9%    | 17            | 22.7%    |
| Doxycycline                                                                  | 33            | 22.3%    | 19            | 25.3%    |
| Metronidazole                                                                | 96            | 64.9%    | 55            | 73.3%    |
| Ciprofloxacin                                                                | 23            | 15.5%    | 12            | 16.0%    |
| Minocycline                                                                  | 17            | 11.5%    | 8             | 10.7%    |
| Erythromycin                                                                 | 19            | 12.8%    | 10            | 13.3%    |
| Not use antibiotics at all                                                   | 33            | 22.3%    | 10            | 13.3%    |
| <b>Periodontal Abscess</b>                                                   | <b>Number</b> | <b>%</b> | <b>Number</b> | <b>%</b> |
| Amoxicillin                                                                  | 114           | 77.0%    | 41            | 54.7%    |
| Augmentin                                                                    | 110           | 74.3%    | 52            | 69.3%    |
| Spiramycin                                                                   | 10            | 6.8%     | 16            | 21.3%    |
| Azithromycin                                                                 | 17            | 11.5%    | 11            | 14.7%    |
| Clindamycin                                                                  | 64            | 43.2%    | 23            | 30.7%    |
| Tetracycline                                                                 | 18            | 12.2%    | 6             | 8.0%     |
| Doxycycline                                                                  | 22            | 14.9%    | 10            | 13.3%    |
| Metronidazole                                                                | 93            | 62.8%    | 44            | 58.7%    |
| Ciprofloxacin                                                                | 22            | 14.9%    | 7             | 9.3%     |
| Minocycline                                                                  | 15            | 10.1%    | 2             | 2.7%     |
| Erythromycin                                                                 | 16            | 10.8%    | 8             | 10.7%    |
| Not use antibiotics at all                                                   | 20            | 13.5%    | 12            | 16.0%    |
